# Supplementary material
Source: ML conference proceedings conference paper supplement (https://openreview.net/forum?id=44IrV2G8qH)
Supplement: supplementary_material [file attachment]

# Synchronous Emotional Dynamics in Human-AI Collaborative Networks: A Temporal Graph Neural Network Approach

## Supplementary Materials

### A Technical Implementation Details

#### A.1 Network Architecture Specifications

##### Graph Neural Network Layers:

- Input dimension: 240 (concatenated multimodal features)
- Hidden layers: [240, 512, 256, 128, 64]
- Activation functions: LeakyReLU ( $\alpha = 0.2$ )
- Dropout rates: [0.1, 0.2, 0.3, 0.2, 0.1]
- Batch normalization after each layer

##### Temporal Attention Mechanism:

```
class TemporalAttention(nn.Module):
    def __init__(self, hidden_dim=128, num_heads=8):
        super().__init__()
        self.multihead_attn = nn.MultiheadAttention(
            hidden_dim, num_heads, dropout=0.1
        )
        self.temporal_pe = PositionalEncoding(hidden_dim)

    def forward(self, x, mask=None):
        x = self.temporal_pe(x)
        attn_output, _ = self.multihead_attn(x, x, x, key_padding_mask=mask)
        return attn_output
```

#### A.2 Loss Function Implementation

```
def tarn_loss(outputs, targets, physiological_data, alignment_weights):
    # Reconstruction loss
    reconstruction = F.mse_loss(outputs.predicted, targets.emotional_state)

    # Temporal consistency loss
    temporal_diff = torch.diff(outputs.predicted, dim=1)
    change_indicators = detect_genuine_changes(physiological_data)
    temporal = torch.mean(temporal_diff ** 2 * (1 - 0.8 * change_indicators))

    # Physiological grounding loss
```

```

physiological = F.mse_loss(
    outputs.physiological_pred,
    physiological_data.processed
)

# Human-AI alignment loss
human_states = outputs.predicted[:, :, 0] # Human nodes
ai_states = outputs.predicted[:, :, 1:] # AI nodes
alignment = -torch.mean(
    F.cosine_similarity(human_states.unsqueeze(2), ai_states, dim=-1)
    * alignment_weights
)

return reconstruction + 0.3 * temporal + 0.2 * physiological + 0.1 * alignment

```

### A.3 Real-Time Processing Pipeline

The system processes multimodal inputs through a synchronized pipeline:

1. Sensor Fusion (10ms): Temporal alignment of physiological streams
2. Feature Extraction (15ms): Parallel processing of EEG, GSR, HRV, and linguistic features
3. Graph Construction (5ms): Dynamic edge weight computation based on communication patterns
4. TARN Forward Pass (45ms): Temporal graph convolution and VAE inference
5. Response Generation (25ms): Emotional state mapping to agent behaviors

**Total Latency:** <100ms end-to-end processing time

## B Supplementary Results

### B.1 Ablation Study Results

Component removal analysis showing the contribution of each TARN module:

| Configuration      | Task Performance | Trust Rating | Emotional Intelligence |
|--------------------|------------------|--------------|------------------------|
| Full TARN          | 8.4±1.1          | 8.1±0.7      | 4.2±0.6                |
| No Temporal Loss   | 7.1±1.4          | 7.2±0.9      | 3.6±0.8                |
| No Physiological   | 6.8±1.6          | 6.9±1.1      | 3.4±0.7                |
| No Graph Structure | 6.2±1.8          | 6.4±1.2      | 3.1±0.9                |
| Basic GNN Only     | 5.9±2.0          | 6.1±1.3      | 2.9±0.8                |

Table 1: Ablation study results for TARN components.

### B.2 Individual Difference Analysis

**Personality Correlations (Big Five Inventory):**

- Extraversion: Stronger response to TARN emotional mirroring ( $r = 0.43, p < 0.001$ )
- Agreeableness: Higher trust ratings across all conditions ( $r = 0.38, p < 0.01$ )
- Neuroticism: Greater sensitivity to emotional consistency ( $r = -0.41, p < 0.001$ )

**Technical Expertise Impact:**

- High Tech: Appreciated system transparency, focus on performance metrics
- Low Tech: Emphasized emotional comfort, anthropomorphic qualities
- No significant interaction between expertise and TARN effectiveness
